# Supplementary material for: Genetic characterization of TET1, TET2, and TET3 alterations in myeloid malignancies
Source: Oxford University Press journal article supplement (doi:10.1182/blood-2009-03-210039), 2009-05-07
Supplement: zh144-sup-tables1.pdf [file zh144-sup-tables1.pdf]

**TET1 Primers** (cDNA accession number: NM\_030625.2)

**Genomic Coordinates of**

| <b>Target Region</b> | <b>Forward/Reverse</b> | <b>Primer Sequence</b>     |
|----------------------|------------------------|----------------------------|
| 70001979–70002359    | Forward                | CTGGGCAACAGAATGAGACC       |
|                      | Reverse                | GTCGCCTGCTAAGAGAGGTG       |
| 70002360–70002739    | Forward                | AGGGAGCCAACAAAATGTG        |
|                      | Reverse                | TGGGGAACCACTGGTATCAT       |
| 70002740–70003119    | Forward                | GGTCGTAGCCAAATCCAAA        |
|                      | Reverse                | CAGGAAGGAAGACAGGCAAG       |
| 70003120–70003499    | Forward                | ATGATACCAGTGGTCCCCA        |
|                      | Reverse                | GACCAGCCTGAGAGAGTTGG       |
| 70003500–70003879    | Forward                | CTTGCCTGTCTTCCTTCCTG       |
|                      | Reverse                | CAAGTGTGAGCTGTCTCCA        |
| 70003880–70004015    | Forward                | CCAATCTCTCAGGCTGGTC        |
|                      | Reverse                | GCTAAGGCATCACTGCACAA       |
| 70030743–70030797    | Forward                | GCAAGCAAGATGGCTACCTC       |
|                      | Reverse                | GCAACACCACAAATGCAGAT       |
| 70074460–70074840    | Forward                | TCGCTGAATGTGTGAAAAGC       |
|                      | Reverse                | TGGGGAGGAATTCTCTGATG       |
| 70074841–70075220    | Forward                | GTAATGGCCCAAGTCAGA         |
|                      | Reverse                | AAGTTTTGGTGGCTCTCCCT       |
| 70075221–70075600    | Forward                | AGAATTCGGCAAGACATTGG       |
|                      | Reverse                | GGTATGGGTGCATCCTGAC        |
| 70075601–70075980    | Forward                | CATCAGAGAATTCCTCCCA        |
|                      | Reverse                | CAAATGTCGCATATTGTGCC       |
| 70075981–70076360    | Forward                | CATCAGTTGCCACCAAGAAA       |
|                      | Reverse                | GCAATGTTGGCAGTCTCTGA       |
| 70076361–70076740    | Forward                | GGCTCAAACGAGGTCCATTA       |
|                      | Reverse                | TATTTTTCCACTTGAGCGGG       |
| 70076741–70076768    | Forward                | TCAGAGACTGCCAACATTGC       |
|                      | Reverse                | TATTTTTCCACTTGAGCGGG       |
| 70081608–70081699    | Forward                | GTTAGGGGCAGGAAGAAAGG       |
|                      | Reverse                | ATGATGGGTGGCTCAGTAGG       |
| 70082263–70082357    | Forward                | CCCTTGACACTGCATACCCT       |
|                      | Reverse                | GCTCTGGAATAACAAGCTTCAAA    |
| 70096807–70097019    | Forward                | GTTGAGGCAGTGGAAAGTCC       |
|                      | Reverse                | TGCACCTGGTCACAGTGAAG       |
| 70102657–70102808    | Forward                | AACCGGTTCTTTAGGCATCC       |
|                      | Reverse                | CAGGGACAATTGGAATTTGG       |
| 70111161–70111251    | Forward                | TTAACCAACATCAGCCATGA       |
|                      | Reverse                | CAGCATTTTTGGAGGGTGAG       |
| 70112598–70112736    | Forward                | AGAACTTCATGAGGAAATTATTTTAA |
|                      | Reverse                | TCATCACAGTATACGTAAGGACTGC  |
| 70116118–70116470    | Forward                | ATTGAACAGAGTTGGGTGGC       |
|                      | Reverse                | CAAGGCAAAGTCCAAACACA       |
| 70120570–70120950    | Forward                | CCAACCAACACAACATCAGC       |
|                      | Reverse                | GGGGTCATCAGATAGGGGTT       |
| 70120951–70121330    | Forward                | CTCCACTGAAGAATGACGCA       |
|                      | Reverse                | AGGCATTAAGAGGGGGAGAA       |
| 70121331–70121710    | Forward                | AACCCCTATCTGATGACCCC       |
|                      | Reverse                | AATACCCACCCCGTTTTGTT       |

**TET2 Primers** (cDNA accession number: NM\_01127208.1)

**Genomic Coordinates of  
Target Region**

**Forward/Reverse**

**Primer Sequence**

| Genomic Coordinates of Target Region | Forward/Reverse | Primer Sequence       |
|--------------------------------------|-----------------|-----------------------|
| 106374502–106374882                  | Forward         | CACCCCTTGTTCTCCATGACC |
|                                      | Reverse         | TGGTTGACTGCTTTACCTG   |
| 106374883–106375262                  | Forward         | AAATGGAGACACCAAGTGGC  |
|                                      | Reverse         | GAGGTATGCGATGGGTGAGT  |
| 106375263–106375642                  | Forward         | ATGAGCAGGAGGGGAAAAGT  |
|                                      | Reverse         | TGGTGTGGTAGTGGCAGAAA  |
| 106375643–106376022                  | Forward         | ACTCACCCATCGCATACCTC  |
|                                      | Reverse         | AGATAGTGCTGTGTTGGGGG  |
| 106376023–106376402                  | Forward         | TTCCACAGGTTTCTCAGCTT  |
|                                      | Reverse         | GAGAAGTGCACCTGGTGTGA  |
| 106376783–106377162                  | Forward         | AAGGCAAGCTTACACCCAGA  |
|                                      | Reverse         | GGTTCCACCTTAATTGGCCT  |
| 106377163–106377542                  | Forward         | AATGTCCAAATGGGACTGGA  |
|                                      | Reverse         | ACTGGCCCTGACATTTCAAC  |
| 106377543–106377922                  | Forward         | CCCCAGAAGGCACTCAAAA   |
|                                      | Reverse         | CAAATTGCTGCCAGACTCAA  |
| 106377923–106378302                  | Forward         | ACTTGATAGCCACACCCAG   |
|                                      | Reverse         | TTCCCCCAACTCATGAAGAC  |
| 106381723–106382102                  | Forward         | ACGTGGGATTTACACAACA   |
|                                      | Reverse         | TGCACAAAAGGTAGAATGCAA |
| 106383439–106383533                  | Forward         | TTCCCATTTTCACCCACAT   |
|                                      | Reverse         | ACCCAATTCTCAGGGTCAGA  |
| 106384175–106384384                  | Forward         | AGGGTCAAAGCCCACTTTTT  |
|                                      | Reverse         | TGAGGCCATGTGGTTACAGA  |
| 106400224–106400375                  | Forward         | GTGTGGTTATGCCACAGCTT  |
|                                      | Reverse         | CCAAAGAGGAAGTTTTTGTTC |
| 106402364–106402454                  | Forward         | ACCATACGGCTTAATTCCCC  |
|                                      | Reverse         | TGTTACAATTGCTGCCAATGA |
| 106410215–106410353                  | Forward         | TGTCATTCCATTTTGTCTGG  |
|                                      | Reverse         | CTGCTAAGCTGTCTCAGCC   |
| 106413169–106413524                  | Forward         | TCTGGATCAACTAGGCCACC  |
|                                      | Reverse         | GGGGGCAAAACCAAAATAAT  |
| 106415653–106416033                  | Forward         | TCAAGCAGAGGCATGTTGAG  |
|                                      | Reverse         | TATTTCCAAACCTTGGCTGG  |
| 106416034–106416413                  | Forward         | AATCCCATGAACCTTACCC   |
|                                      | Reverse         | ACCAGACCTCATCGTTGTCC  |
| 106416414–106416793                  | Forward         | ATCAGTGGACAACCTGCTCC  |
|                                      | Reverse         | ATGAAACGCAGGTAAGTGGG  |
| 106416794–106417173                  | Forward         | ATTGGCACTAGTCCAGGGTG  |
|                                      | Reverse         | ACTGTGACCTTTCCCCACTG  |

**TET3 Primers** (cDNA accession number: NM\_144993.1)**Genomic Coordinates of**

| <b>Target Region</b>  | <b>Forward/Reverse</b> | <b>Primer Sequence</b> |
|-----------------------|------------------------|------------------------|
| 74,083,745–74,083,801 | Forward                | CCTTTCTTTCCCAGGCTGTA   |
|                       | Reverse                | CAGCTGCTGCTAACACACACA  |
| 74,126,913–74,127,550 | Forward                | CAGATGTGCACCTGAGTGGT   |
|                       | Reverse                | CGGTCTGCAAGCTGATGTT    |
| 74,127,551–74,128,200 | Forward                | AGAGGTGCCCCAGATCTCTC   |
|                       | Reverse                | TTCTCCTTGGGTGGTCTGTC   |
| 74154233–74154274     | Forward                | TGTTGGTGGTTTGTCTTTCTAA |
|                       | Reverse                | GCAAAGAAAATGAGAGGCG    |
| 74161132–74161226     | Forward                | ACTCAGCTAACAGGGCTGGA   |
|                       | Reverse                | CTCCCCTGGACAGTCAACAT   |
| 74168464–74168673     | Forward                | TGACATCCCTAGAACCCCTGC  |
|                       | Reverse                | TGGATATGCCTTCTCAACC    |
| 74170531–74170682     | Forward                | GGTGGGGAAGGATGAGTCT    |
|                       | Reverse                | TTCCACTTCTGTGCATCTG    |
| 74173536–74173626     | Forward                | TGAAGGAAAGGCCAGAAAGA   |
|                       | Reverse                | ACTCTCCCACTTCCCACCTT   |
| 74174163–74174301     | Forward                | TAACCCATCCACCTCCTCTG   |
|                       | Reverse                | GTCTCCAGGTCCCTCCCTAC   |
| 74179910–74180247     | Forward                | CATGTGTTTTGGGTGCTCAG   |
|                       | Reverse                | AAGCTCACTTCCACGCAGAT   |
| 74181027–74181407     | Forward                | GTGAAGAGAGGAGTCGGTGG   |
|                       | Reverse                | GTAGCAGTTGGAGCTCTGGG   |
| 74181408–74181787     | Forward                | CAATGGCTTCCACTCCAAGT   |
|                       | Reverse                | ACTACCTTTCAGGGCCGAGT   |
| 74181788–74182167     | Forward                | CCCAGAGCTCCAAGTCTAC    |
|                       | Reverse                | CCCACAGCTTCTCTCTGAC    |
| 74182168–74182547     | Forward                | ACTCGGCCCTGAAAGGTAGT   |
|                       | Reverse                | GCAAAGCACCACAGAGACA    |
| 74,182,497–74,182,811 | Forward                | GCTCCATCCTCATCGAGTGT   |
|                       | Reverse                | GCAAAGCACCACAGAGACA    |
| 74182548–74182927     | Forward                | CAGAGGAGAAGCTGTGGGAC   |
|                       | Reverse                | CCGACAGCCGTAGTTTCTTC   |
| 74182928–74183205     | Forward                | TGCCTACACGAAGGTCACTG   |
|                       | Reverse                | TCTGCAGACTCTCCCATCCT   |

**TET2 MSP Primers:** Primers were designed using the *MSPprimer* algorithm

(<http://www.mspprimer.org/cgi-mspprimer/design.cgi>; Brandes JC, Carraway H, Herman JG.

*Oncogene*. 2007 Sep 13;26(42):6229-37. Epub 2007 Mar 26). The genomic sequence for TET2 and 1000 bases upstream was obtained from the UCSC genome browser

(<http://genome.ucsc.edu>) and submitted to MSPprimer; primers were then designed based on the length of the specificity-determining subsequence (SDSS) and increasing values of delta-SDSS1 and delta-SDSS2.

**Methylated/Unmethylated  
Specificity  
(Sense/Antisense)**

**Primer  
Location**

**Primer Sequence**

|                        |  |                                    |
|------------------------|--|------------------------------------|
| Methylated Sense       |  | CGAGAGtTTGGGCGGtC                  |
| Methylated Antisense   |  | GTCTaTTCTCATCACTCAaCGaaaCCG        |
| Unmethylated Sense     |  | tGGtGAGAGtTTGGGtGGttG              |
| Unmethylated Antisense |  | aTTTaaCaTCTaTTCTCATCACTCAaCaaaaCCa |
| Methylated Sense       |  | TTttCGAGGGtTGtAttTtTTttCGCGtTC     |
| Methylated Antisense   |  | CACCTaaaaCCGTACAaCGaaaCG           |
| Unmethylated Sense     |  | GGGTtTTtGAGGGtTGtAttTtTTTTtGtGtTtG |
| Unmethylated Antisense |  | aaCCaaCaaCACCTaaaaCCaTACAaCaaaaCa  |
