# Supplementary material for: Genetic characterization of TET1, TET2, and TET3 alterations in myeloid malignancies
Source: Oxford University Press journal article supplement (doi:10.1182/blood-2009-03-210039), 2009-05-07
Supplement: zh144-sup-tables2.pdf [file zh144-sup-tables2.pdf]

| ID | Age | Sex | Type of AML           | % Blasts at sample acquisition | Cytogenetics                    | TET 2         | Genetic Status |           |               |
|----|-----|-----|-----------------------|--------------------------------|---------------------------------|---------------|----------------|-----------|---------------|
|    |     |     |                       |                                |                                 |               | Flt3           | NPM1      | CEBPa         |
| 1  | 91  | M   | s-AML (MDS)           | 50%                            | tri(8)                          | <b>Mutant</b> | Wild-type      | Wild-type | Wild-type     |
| 2  | 75  | M   | s-AML (MDS)           | 37%                            | normal                          | <b>Mutant</b> | Wild-type      | Wild-type | Wild-type     |
| 3  | 72  | F   | s-AML (MDS)           | 58%                            | del(5q),-p53                    | <b>Mutant</b> | Wild-type      | Wild-type | Wild-type     |
| 4  | 47  | F   | Primary AML (M4)      | 48%                            | 5q-                             | <b>Mutant</b> | Wild-type      | Wild-type | Wild-type     |
| 5  | 63  | M   | s-AML (MDS)           | 22%                            | del(6),del(20q12)               | <b>Mutant</b> | Wild-type      | Wild-type | Wild-type     |
| 6  | 86  | F   | s-AML (MDS)           | 22%                            | del(11q),20q-                   | <b>Mutant</b> | Wild-type      | Wild-type | Wild-type     |
| 7  | 57  | M   | Primary AML (M5)      | 31%                            | del(7q),tri(8)                  | <b>Mutant</b> | <b>D835Y</b>   | Wild-type | Wild-type     |
| 8  | 69  | M   | Primary AML (M1)      | 31%                            | tri(1,4,15,19,20),tetra(8)      | <b>Mutant</b> | Wild-type      | Wild-type | Wild-type     |
| 9  | 39  | M   | Primary AML (M5)      | 35%                            | Normal                          | Wild-type     | Wild-type      | Wild-type | Wild-type     |
| 10 | 78  | M   | s-AML (MDS)           | 23%                            | tri(5),tri(8)                   | Wild-type     | Wild-type      | Wild-type | Wild-type     |
| 11 | 33  | F   | Primary AML (M4eo)    | 32%                            | inv(16)                         | Wild-type     | Wild-type      | Wild-type | Wild-type     |
| 12 | 65  | M   | s-AML (MDS)           | 65%                            | del(2p),mono(17)                | Wild-type     | Wild-type      | Wild-type | Wild-type     |
| 13 | 6   | M   | Biphenotypic leukemia | 68%                            | Not available                   | Wild-type     | Wild-type      | Wild-type | Wild-type     |
| 14 | 77  | M   | s-AML (MDS)           | 68%                            | normal                          | Wild-type     | Wild-type      | Wild-type | Wild-type     |
| 15 | 73  | F   | Primary AML (M2)      | 81%                            | Normal                          | Wild-type     | Wild-type      | Wild-type | Wild-type     |
| 16 | 18  | M   | Biphenotypic leukemia | 93%                            | Normal                          | Wild-type     | Wild-type      | Wild-type | Wild-type     |
| 17 | 77  | M   | s-AML (MDS)           | 25%                            | Normal                          | Wild-type     | Wild-type      | Wild-type | Wild-type     |
| 18 | 81  | F   | s-AML (MDS)           | 30%                            | tri(8),tri(19)                  | Wild-type     | Wild-type      | Wild-type | Wild-type     |
| 19 | 74  | M   | s-AML (MDS)           | 24%                            | del(5q),-7,-20,TEL deletion     | Wild-type     | <b>+ITD</b>    | Wild-type | <b>Mutant</b> |
| 20 | 61  | F   | s-AML (MDS)           | 49%                            | del(5q),tri(8), mono(7),tri(11) | Wild-type     | Wild-type      | Wild-type | Wild-type     |
| 21 | 61  | F   | s-AML (MDS)           | 49%                            | del(5q),tri(8)                  | Wild-type     | Wild-type      | Wild-type | Wild-type     |
| 22 | 55  | F   | s-AML (MDS)           | 23%                            | mono(5),del(7q), tri(8)         | Wild-type     | Wild-type      | Wild-type | Wild-type     |
| 23 | 60  | F   | t-AML                 | 29%                            | del(7q)                         | Wild-type     | Wild-type      | Wild-type | Wild-type     |
| 24 | 85  | F   | Primary AML(M1)       | 40%                            | del7q,tri(11)                   | Wild-type     | Wild-type      | Wild-type | Wild-type     |
| 25 | 85  | F   | Primary AML (M1)      | 42%                            | del(7q),tri(11)                 | Wild-type     | Wild-type      | Wild-type | Wild-type     |

| ID | Age | Sex | Type of AML      | % Blasts at sample acquisition | Cytogenetics                            | Genetic Status |             |           |               |
|----|-----|-----|------------------|--------------------------------|-----------------------------------------|----------------|-------------|-----------|---------------|
|    |     |     |                  |                                |                                         | TET 2          | Flt3        | NPM1      | CEBPa         |
| 26 | 85  | F   | Primary AML (M1) | 56%                            | del(7q),tri(11)                         | Wild-type      | Wild-type   | Wild-type | Wild-type     |
| 27 | 63  | M   | Primary AML (M3) | 71%                            | t(15;17)                                | Wild-type      | <b>+ITD</b> | Wild-type | Wild-type     |
| 28 | 72  | M   | s-AML (MDS)      | 61%                            | normal                                  | Wild-type      | Wild-type   | Wild-type | Wild-type     |
| 29 | 42  | M   | Primary AML (M2) | 67%                            | 5q-                                     | Wild-type      | Wild-type   | Wild-type | Wild-type     |
| 30 | 75  | M   | s-AML (MDS)      | 59%                            | normal                                  | Wild-type      | Wild-type   | Wild-type | Wild-type     |
| 31 | 73  | M   | s-AML (MDS)      | 47%                            | normal                                  | Wild-type      | Wild-type   | Wild-type | Wild-type     |
| 32 | 49  | F   | Primary AML (M7) | 25%                            | Tri(21), tri(22)                        | Wild-type      | Wild-type   | Wild-type | Wild-type     |
| 33 | 15  | M   | Primary AML (M4) | 40%                            | tri(8),tri(13)                          | Wild-type      | Wild-type   | Wild-type | Wild-type     |
| 34 | 27  | M   | Primary AML (M1) | 72%                            | add(10p),del(11q),tri(21),t(8;21),+AML1 | Wild-type      | Wild-type   | Wild-type | Wild-type     |
| 35 | 59  | F   | s-AML (MDS)      | 29%                            | Normal                                  | Wild-type      | Wild-type   | Wild-type | <b>Mutant</b> |
| 36 | 54  | F   | t-AML            | 40%                            | 5q-,mono(7)                             | Wild-type      | Wild-type   | Wild-type | Wild-type     |
| 37 | 75  | M   | s-AML (CML)      | 32%                            | Ph+,mono(7)                             | Wild-type      | Wild-type   | Wild-type | Wild-type     |
| 38 | 53  | M   | Primary AML (M5) | 57%                            | tri(8),tri(13),inv(16)                  | Wild-type      | Wild-type   | Wild-type | Wild-type     |
| 39 | 27  | M   | s-AML (MDS)      | 23%                            | tri(11),+MLL                            | Wild-type      | Wild-type   | Wild-type | Wild-type     |
| 40 | 41  | M   | Primary AML (M2) | 20%                            | tri(8)                                  | Wild-type      | <b>+ITD</b> | Wild-type | Wild-type     |
| 41 | 57  | M   | Primary AML (M2) | 21%                            | 5q-                                     | Wild-type      | Wild-type   | Wild-type | Wild-type     |
| 42 | 65  | M   | s-AML (MDS)      | 38%                            | normal                                  | Wild-type      | Wild-type   | Wild-type | Wild-type     |
| 43 | 53  | F   | Primary AML (M2) | 25%                            | tri(11)                                 | Wild-type      | Wild-type   | Wild-type | <b>Mutant</b> |
| 44 | 72  | F   | s-AML (MDS)      | 64%                            | normal                                  | Wild-type      | Wild-type   | Wild-type | Wild-type     |
| 45 | 35  | M   | Primary AML (M2) | 83%                            | normal                                  | Wild-type      | Wild-type   | Wild-type | <b>Mutant</b> |
| 46 | 82  | M   | s-AML (MDS)      | 20%                            | normal                                  | Wild-type      | Wild-type   | Wild-type | Wild-type     |
| 47 | 77  | M   | Primary AML (M3) | 48%                            | t(15;17), tri(8)                        | Wild-type      | Wild-type   | Wild-type | Wild-type     |
| 48 | 48  | F   | s-AML (MDS)      | 25%                            | t(1p;1q)                                | Wild-type      | Wild-type   | Wild-type | Wild-type     |
| 49 | 32  | F   | Primary AML (M4) | 95%                            | mono(3)mono(7)                          | Wild-type      | Wild-type   | Wild-type | Wild-type     |

| ID | Age | Sex | Type of AML            | % Blasts at sample acquisition | Cytogenetics                                    | TET 2     | Genetic Status |               |               |
|----|-----|-----|------------------------|--------------------------------|-------------------------------------------------|-----------|----------------|---------------|---------------|
|    |     |     |                        |                                |                                                 |           | Flt3           | NPM1          | CEBPa         |
| 50 | 60  | M   | Primary AML (M4)       | 72%                            | del(9q)                                         | Wild-type | <b>+ITD</b>    | Wild-type     | Wild-type     |
| 51 | 75  | F   | s-AML (MDS)            | 57%                            | del13p,mono(5),tri(8),del(5q),del(20q),+MLL,+13 | Wild-type | Wild-type      | Wild-type     | Wild-type     |
| 52 | 72  | M   | s-AML (MDS)            | 33%                            | del(20q)                                        | Wild-type | Wild-type      | Wild-type     | Wild-type     |
| 53 | 6   | M   | Primary AML (M4)       | 35%                            | t(1;4),t(3;6)                                   | Wild-type | <b>+ITD</b>    | Wild-type     | Wild-type     |
| 54 | 48  | F   | Primary AML (M2)       | 43%                            | Normal                                          | Wild-type | Wild-type      | Wild-type     | <b>Mutant</b> |
| 55 | 61  | M   | Primary AML (M4)       | 62%                            | t(3;5)(q21;q23)                                 | Wild-type | <b>+ITD</b>    | Wild-type     | Wild-type     |
| 56 | 69  | M   | Primary AML (M2)       | 60%                            | tri(8)                                          | Wild-type | <b>+ITD</b>    | Wild-type     | Wild-type     |
| 57 | 64  | M   | s-AML (Myelofibrosis)) | 34%                            | normal                                          | Wild-type | Wild-type      | Wild-type     | Wild-type     |
| 58 | 59  | F   | s-AML (MDS)            | 29%                            | 5q-,+MLL                                        | Wild-type | Wild-type      | Wild-type     | Wild-type     |
| 59 | 55  | M   | Primary AML (M6)       | 60%                            | normal                                          | Wild-type | Wild-type      | Wild-type     | Wild-type     |
| 60 | 77  | F   | s-AML (MDS)            | 83%                            | del(5q),-7,del(6q),del(11p)                     | Wild-type | Wild-type      | Wild-type     | Wild-type     |
| 61 | 54  | M   | s-AML (MDS)            | 60%                            | tri(21),del(9)                                  | Wild-type | <b>D835H</b>   | Wild-type     | Wild-type     |
| 62 | 44  | F   | Primary AML (M2)       | 39%                            | mono(7)                                         | Wild-type | Wild-type      | Wild-type     | Wild-type     |
| 63 | 66  | M   | s-AML (MDS)            | 36%                            | inv(16)                                         | Wild-type | Wild-type      | Wild-type     | Wild-type     |
| 64 | 65  | F   | Primary AML (M1)       | 50%                            | normal                                          | Wild-type | Wild-type      | Wild-type     | Wild-type     |
| 65 | 49  | F   | Primary AML (M2)       | 57%                            | tri(8)                                          | Wild-type | <b>+ITD</b>    | Wild-type     | <b>Mutant</b> |
| 66 | 56  | F   | Primary AML (M2)       | 91%                            | inv(3),del(10q),tri(21)                         | Wild-type | Wild-type      | Wild-type     | Wild-type     |
| 67 | 72  | M   | Primary AML (M4)       | 35%                            | normal                                          | Wild-type | <b>+ITD</b>    | Wild-type     | Wild-type     |
| 68 | 77  | F   | s-AML (MDS)            | 60%                            | inv(3)                                          | Wild-type | Wild-type      | Wild-type     | Wild-type     |
| 69 | 75  | F   | s-AML (MDS)            | 22%                            | normal                                          | Wild-type | Wild-type      | Wild-type     | Wild-type     |
| 70 | 22  | M   | Primary AML (M3)       | 91%                            | t15;17                                          | Wild-type | Wild-type      | Wild-type     | Wild-type     |
| 71 | 80  | F   | Primary AML (M2)       | 92%                            | normal                                          | Wild-type | Wild-type      | Wild-type     | Wild-type     |
| 72 | 64  | M   | s-AML (MDS)            | 37%                            | normal                                          | Wild-type | Wild-type      | Wild-type     | Wild-type     |
| 73 | 69  | F   | Primary AML (M2)       | 27%                            | normal                                          | Wild-type | Wild-type      | <b>Mutant</b> | Wild-type     |
| 74 | 72  | M   | s-AML (MDS)            | 21%                            | tri(8)                                          | Wild-type | Wild-type      | Wild-type     | Wild-type     |

| ID | Age | Sex | Type of AML           | % Blasts at sample acquisition | Cytogenetics       | TET 2     | Genetic Status |               |           |
|----|-----|-----|-----------------------|--------------------------------|--------------------|-----------|----------------|---------------|-----------|
|    |     |     |                       |                                |                    |           | Flt3           | NPM1          | CEBPa     |
| 75 | 46  | M   | Primary AML (M2)      | 60%                            | normal             | Wild-type | <b>D835Y</b>   | <b>Mutant</b> | Wild-type |
| 76 | 62  | M   | Primary AML (M1)      | 20%                            | normal             | Wild-type | <b>+ITD</b>    | <b>Mutant</b> | Wild-type |
| 77 | 66  | M   | Primary AML (M2)      | 70%                            | tri(8)             | Wild-type | Wild-type      | Wild-type     | Wild-type |
| 78 | 62  | M   | s-AML (MDS)           | 38%                            | normal             | Wild-type | Wild-type      | Wild-type     | Wild-type |
| 79 | 76  | M   | Primary AML (M5)      | 57%                            | normal             | Wild-type | Wild-type      | Wild-type     | Wild-type |
| 80 | 69  | M   | s-AML (CMML)          | 33%                            | tri(8)             | Wild-type | Wild-type      | Wild-type     | Wild-type |
| 81 | 77  | M   | s-AML (MDS)           | 23%                            | normal             | Wild-type | Wild-type      | Wild-type     | Wild-type |
| 82 | 72  | M   | Primary AML (M1)      | 84%                            | 5q-,+MLL           | Wild-type | Wild-type      | Wild-type     | Wild-type |
| 83 | 69  | M   | Primary AML (M2)      | 38%                            | normal             | Wild-type | Wild-type      | Wild-type     | Wild-type |
| 84 | 71  | F   | Biphenotypic leukemia | 83%                            | 5q-,+MLL           | Wild-type | Wild-type      | Wild-type     | Wild-type |
| 85 | 76  | F   | Primary AML (M2)      | 20%                            | normal             | Wild-type | Wild-type      | <b>Mutant</b> | Wild-type |
| 86 | 48  | F   | Biphenotypic leukemia | 80%                            | inv(3q),mono(7)    | Wild-type | Wild-type      | Wild-type     | Wild-type |
| 87 | 69  | F   | Primary AML (M2)      | 50%                            | del(20q)           | Wild-type | Wild-type      | <b>Mutant</b> | Wild-type |
| 88 | 62  | F   | Primary AML (M4)      | 40%                            | del(13q)           | Wild-type | <b>+ITD</b>    | Wild-type     | Wild-type |
| 89 | 79  | M   | Primary AML (M5)      | 15%                            | tri(14)            | Wild-type | Wild-type      | Wild-type     | Wild-type |
| 90 | 33  | F   | Primary AML (M4)      | 30%                            | t(9;11),+MLL,del3p | Wild-type | Wild-type      | Wild-type     | Wild-type |
| 91 | 65  | F   | Primary AML (M3)      | 25%                            | normal             | Wild-type | Wild-type      | Wild-type     | Wild-type |
| 92 | 73  | F   | s-AML (MDS)           | 65%                            | Tri(8)             | Wild-type | Wild-type      | Wild-type     | Wild-type |
| 93 | 51  | F   | Primary AML (M1)      | 77%                            | Normal             | Wild-type | <b>+ITD</b>    | Wild-type     | Wild-type |
