# Supplementary material for: Genetic characterization of TET1, TET2, and TET3 alterations in myeloid malignancies
Source: Oxford University Press journal article supplement (doi:10.1182/blood-2009-03-210039), 2009-05-07
Supplement: zh144-sup-tables3.pdf [file zh144-sup-tables3.pdf]

**TET1**

| <b>Nucleic Acid Change</b> | <b>Genomic Coordinates</b> | <b>Amino Acid Change</b> |
|----------------------------|----------------------------|--------------------------|
| 888 G>GT                   | 70002484                   | V127F                    |
| 1527 C>CT                  | 70003124                   | A340V                    |
| 2674 G>GA                  | 70074601                   | S700N                    |
| 3560 A>AG                  | 70075548                   | K1018E                   |
| 4766 A>AG                  | 70076754                   | T1420A                   |
| 5503 C>CG                  | 70116127                   | T1666S                   |

**TET3**

| <b>Nucleic Acid Change</b> | <b>Genomic Coordinates</b> | <b>Amino Acid Change</b> |
|----------------------------|----------------------------|--------------------------|
| 320 C>CG                   | 74181348                   | H107Q                    |
| 628 C>CG                   | 74181656                   | P210R                    |
